# Supplementary material
Source: publisher figshare collection journal article supplement (https://tandf.figshare.com/ndownloader/files/14617160)

**Figure legends**

**Figure 1:** Schematic representation of hybrid erythrocyte-membrane-chaperoned nano-carriers: Preparation process of nanoerythrocyte membrane-coated 5-FU loaded liposomes.

**Figure 2:** Zeta sizer charts of particle size (A) and zeta potential (B) of hybrid nanoerythrocyte-membrane-coated 5-FU loaded liposomes.

**Figure 1**

**
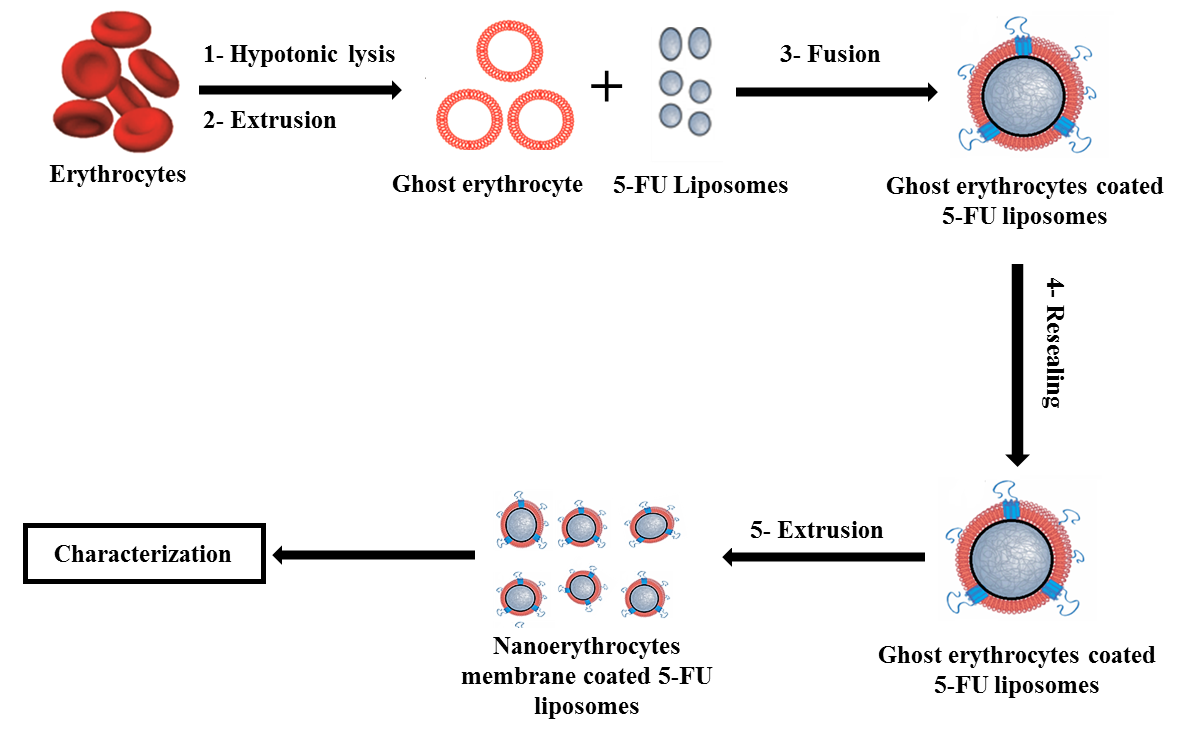
**

**Figure 2**


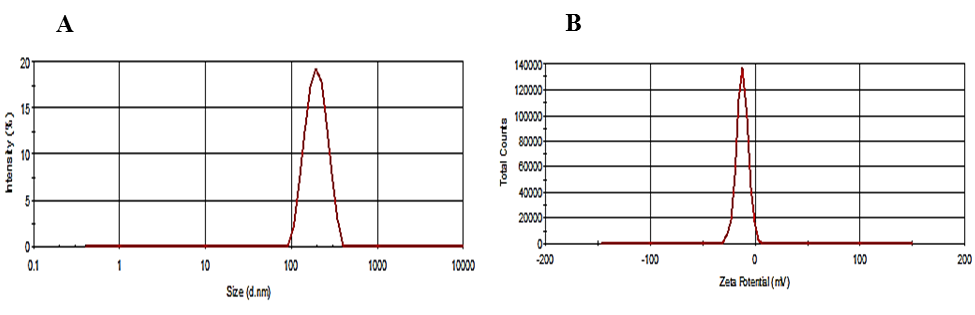

Supplement: Supplementary file 1 [file 14617160]
